# Supplementary material for: Application of Spectroscopic Methods for the Identification of Superoxide Dismutases in Cyanobacteria
Source: MDPI journal article supplement (doi:10.3390/ijms232213819), 2022-11-10
Supplement: s1 [file s1]

## **Supplementary materials**

### **Application of spectroscopic methods for the identification of superoxide dismutases in cyanobacteria**

**Monika Kula-Maximenko <sup>1</sup>, Kamil Jan Zieliński <sup>1</sup>, Joanna Depciuch <sup>2</sup>, Janusz Lekki <sup>2</sup>,  
Marcin Niemiec <sup>3</sup> and Ireneusz Ślesak <sup>1,\*</sup>**

<sup>1</sup> The Franciszek Górski Institute of Plant Physiology, Polish Academy of Sciences,  
Niezapominajek 21, 30-239 Krakow, Poland

<sup>2</sup> Institute of Nuclear Physics, Polish Academy of Sciences, 31-342 Krakow, Poland

<sup>3</sup> Department of Agricultural and Environmental Chemistry, University of Agriculture in  
Krakow, 31-120 Krakow, Poland

\* Correspondence: i.slesak@ifr-pan.edu.pl; Tel.: +48-124-251-833

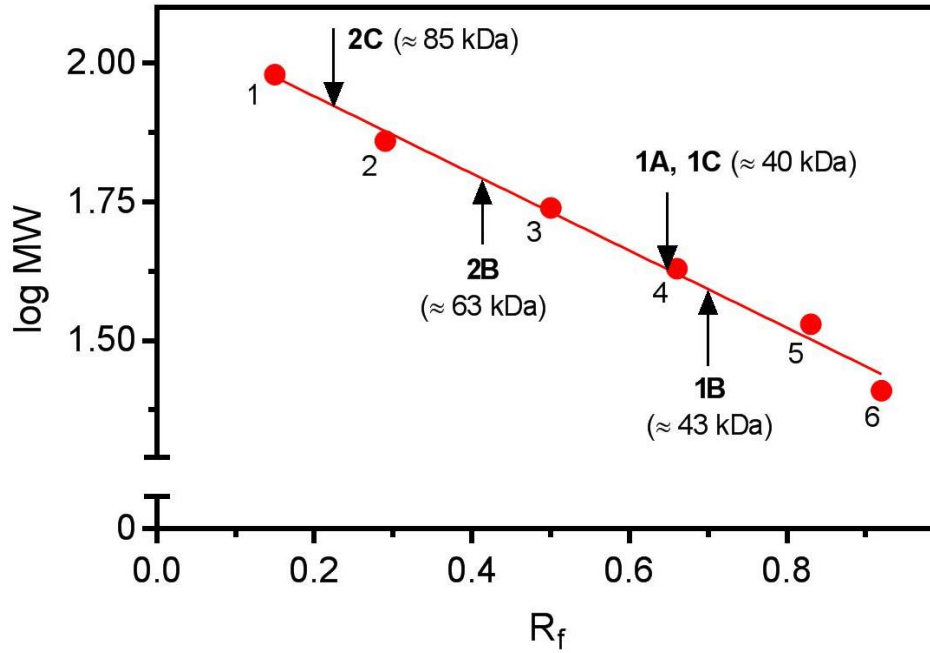

Figure S1. Determining the molecular weight (MW) of SODs from Figure 2. (the main text of the article). Arrows indicate the estimated MW (kDa) for each SOD band: 1A, 1B, 1C, 2B, and 2C. A standard curve of the log MW vs.  $R_f$  was generated using the PageRuler™ Prestained Protein Ladder (Thermo Scientific) from Figure 2 (the main text of the article). The strong relationship ( $R^2 = 0.9904$ ,  $y = -0.6952x + 2.08$ ,  $P < 10^{-4}$ ) between the proteins' MW and the relative migration distance ( $R_f$ ) demonstrates reliability in predicting MW.  $R_f$  is defined as the migration distance of the protein through the gel divided by the migration distance of the dye front. The numbers near calibration points represent marker proteins from the PageRuler™ Prestained Protein Ladder: 1. 95 kDa, 2. 72 kDa, 3. 55 kDa, 4. 43 kDa, 5. 34 kDa, 6. 26 kDa.

Table S1. Parameters, i.e., log MW and  $R_f$  values used for preparation the curve from Figure S1.

| No. | MW [kDa] | log MW | $R_f$ |
|-----|----------|--------|-------|
| 1   | 95       | 1.98   | 0.15  |
| 2   | 72       | 1.86   | 0.29  |
| 3   | 55       | 1.74   | 0.50  |
| 4   | 43       | 1.63   | 0.66  |
| 5   | 34       | 1.53   | 0.83  |
| 6   | 26       | 1.41   | 0.92  |

Table S2. MW of SODs determined based on the curve from Figure S1.

| SOD activity bands | $R_f$ | log MW <sup>a</sup> | Estimated MW [kDa] <sup>b</sup> |
|--------------------|-------|---------------------|---------------------------------|
| 1A (FeSOD1)        | 0.7   | 1.6                 | ~ 40 (39.8)                     |
| 1B (FeSOD1)        | 0.65  | 1.63                | ~ 43 (42.6)                     |
| 1C (FeSOD1)        | 0.7   | 1.6                 | ~ 40 (39.8)                     |
| 2B (FeSOD2)        | 0.41  | 1.8                 | ~ 63 (63.09)                    |
| 2C (FeSOD2)        | 0.22  | 1.93                | ~ 85 (85.1)                     |

<sup>a</sup>Values calculated based on the equation of the curve from Fig. 1S, i.e.  $y = -0.6952x + 2.08$

<sup>b</sup>Calculated based on  $MW = 10^y$

## Notes S1.

### Sequenced 16S rRNA fragments for *Geitlerinema* sp. ZHR1A and *G. violaceus* CCALA979

> *Geitlerinema* sp. ZHR1A, 16S rRNA (fragment) obtained using CYA 359F and CYA 781R

```
TGTGGGAATTTTCCGCAATGGGCGAAAGCCTGACGGAGCAATACCGCGTGAGGGACGAAGGCCTGTGGGTGTAA
ACCTCTTTTCTCAGGGAAGAAGATCTGACGGTACCTGAGGAATCAGCATCGGCTAACTCCGTGCCAGCAGCCGCG
GTAAGACGGAGGATGCAAGCGTTATCCGGAATTATTGGGCGTAAAGCGTCCGCAGGCGGTCTCGTAAGTCTGTCT
TTAAAGCGTGGAGCTTAACTCCATAAAGGGGATGGAAACTGCGAGACTAGAGGTAGGTAGGGGTAGAAGGAATTC
CCAGTGTAGCGGTGAAATGCGTAGATATTGGGAAGAACACCAGCAGCGAAGGCGTTCTACTGGACCAAACCTGAC
GCTCATGGACGAAAGCTAGGGGAGCGAAWGGGATTAGATACCCCWGTAGTCAA
```

> *Gloeobacter violaceus* CCALA 979, 16S rRNA (fragment) obtained using CYA 359F and CYA 781R

```
TGTGTGAATTTTCCGCAATGGGCGAAAGCCTGACGGAGCAACGCCGCGTGGGTGATGAAGGCCCGTGGGTCTGTA
AGCCCTTTTGTGTCAGGGACGAAACCTGACGGTACCTGACGAATAAGCATCGGCTAACTCCGTGCCAGCAGCCGCG
TAATACGGAGGATGCAAGCGTTATCCGGAATTATTGGGCGTAAAGCGTACGTAGGCGGCCAGCCAAGTCTGGGGT
CAAAGCCCGCAGCCTAACTGCGGAAAGGCCCTGGAAACTGGTTGGCTAGAGTGCGGTAGGGGCAAGGGGAATTCC
CGGTGTAGCGGTGAAATGTGGAGATATCGGGAAGAACACCAGCGGCGAAAGCGCCTTGCTGGACCGCAACTGACG
CTGAGGTACGAAAGCCAGGGGAGCAAAGGGGATTAGATACCCCWGTAGTACA
```

Y: C/T

W: A/T

## Notes S2.

### All 16S rRNA sequences used for reconstruction of the phylogenetic tree

>ENA|BA000045.2:1571231..1572715:rRNA|BA000045.2:1571231..1572715:rRNA.2 *Gloeobacter violaceus* PCC 7421 16S rRNA

```
AAAATGGAGAGTTTGATCCTGGCTCAGGATGAACGCTGGCGGCGTGCTTAACACATGCAAGTCGAACGAGATCTTCGGATCGAGTGGCGGACGG
GTGAGTAACACGTGGGAATCTGCCCTCAGGAGGGGGATAACGGCCGGAACGGCCGCTAATACCCCATATGCCGAAGGTGAAATGAATTTTCGC
CTGAGGATGAGCCCGCGTCTGATTAGCTAGTTGGTGGGGTAATGGCCTACCAAGGCTACGATCAGTAGCTGGTCTGAGAGGATGATCAGCCACA
CTGGGACTGAGACACGGCCAGACTCCTACGGGAGGCAGCAGTGGGGAATTTTCCGCAATGGGCGAAAGCCTGACGGAGCAACGCCGCGTGGGT
GATGAAGGCCCGTGGGTCTGTAAGCCCTTTTGTGAGGGACGAAACCTGACGGTACCTGACGAATAAGCATCGGCTAACTCCGTGCCAGCAGCCG
CGGTAATACGGAGGATGCAAGCCTTATCCGGAATTATTGGGCGTAAAGCGTACGTAGGCGGCCAGCCAAGTCTGGGGTCAAAGCCCGCAGCCTA
ACTGCGGAAAGCGCTGGAACTGGTTGGCTAGAGTGGGTAGGGGCAAGGGGAATTTCCGGTGTAGCGGTGAAATGTGGAGATATCGGGAAGA
ACACCAGCGGCGAAAGCGCCTTGTCTGGACCGCAACTGACGCTGAGGTACGAAAGCCAGGGGAGCAAATGGGATTAGATACCCAGTAGTCTCTGG
CCGTAAACGATGGACACTAGGTGTTGCGCGTATCGACCCGTGCAGTGCCGTAGCTAACGCGTTAAGTGTCCCGCTGGGGAGTACGCACGCAAG
TGTGAAACTCAAAGGAATTGACGGGGGCGCCGACAAAGCGGTGGAGCATGTGGTTTAATTCGATGCAACGCGAAGAACCTTACCAGGGCTTGACA
TGTCCGGAATCTCGCGGAACGTGGGAGTGCCCTTCGGGAACGCGAAGCAACATGTTCCGCAATGGGCGTGCATGGCTGTCTGTCAGCTGTCTGGGT
TAAGTCCCGCAACGAGCGCAACCCCTCGTCTGTCAGTTGCCATCATTCAGTTGGGCACTCTGGCGAGACTGCCGGTGACAAACCGGAGGAAGGTGG
GGATGACGTCAAGTCAGCATGGCTCTTACGTCTCGGTACACACGTGCTACAATGGTTCCGATAAAGGGCTCGCAATCTCGCAGGGGGAGGCCA
ATCCCATAAACCGAATCTCAGTTCGGATTGCAGGCTGCAACTCGCCTGAGTGAAGTCGGAATCGCTAGTAATCGCAGGTGAGCATACTGCGGTG
AATACGTTCCCGGCCCTTGTACACACCGCCGTCACACCATGGAGGCTGGTATGCCCGGAAGTCGGTATCTTAACCGCAAGGAGGGAGCCGCCG
AAGGCGGGGCGGTGACTGGGGTGAAGTCGTAACAAGGTAGCCGTACCGGAAGGTGCGGCTGGATCACCTCCTTT
```

>ENA|CP003587.1:2731683..2733167:rRNA|CP003587.1:2731683..2733167:rRNA.1 *Gloeobacter kilauensis* JS1 16S ribosomal RNA

```
AAAATGGAGAGTTTGATCCTGGCTCAGGATGAACGCTGGCGGCGTGCTTAACACATGCAAGTCGAACGAGATCTTCGGATCTAGTGGCGGACGG
GTGAGTAACACGTGGGAATCTGCCCTCAGGAGGGGGATAACATTCGGAACGAGTGCTAATACCCCATATGCCGCAAGGTGAAATGAATTTTCGC
CTGAGGATGAGCCCGCGTCTGATTAGCTAGTTGGTGGGGTAATGGCCTACCAAGGCGACGATCAGTAGCTGGTCTGAGAGGATGATCAGCCACA
CTGGGACTGAGACACGGCCAGACTCCTACGGGAGGCAGCAGTGGGGAATTTTCCGCAATGGGCGAAAGCCTGACGGAGCAACGCCGCGTGGGT
GATGAAGGCCCGTGGGTCTGTAAGCCCTTTTGTGAGGGACGAAACCTGACGGTACCTGACGAATAAGCATCGGCTAACTCCGTGCCAGCAGCCG
CGGTAATACGGAGGATGCAAGCCTTATCCGGAATTATTGGGCGTAAAGCGTACGTAGGTGGCCAGCCAAGTCTGGGGTCAAAGCCCGCAGCCTA
ACTGCGGAAAGGCCCTGGAACTGGTTGGCTAGAGTGGGTAGGGGCAAGGGGAATTTCCCGGTGTAGCGGTGAAATGTGGAGATATCGGGAAGA
ACACCAGCGGCGAAAGCGCCTTGTCTGGACCGCAACTGACGCTGAGGTACGAAAGCCAGGGGAGCAAATGGGATTAGATACCCAGTAGTCTCTGG
CCGTAAACGTTGGACACTAGGTGTTGCGCGTATCGACCCGTGCAGTGCCGTAGCTAACGCGTTAAGTGTCCCGCTGGGGAGTACGCACGCAAG
TGTGAAACTCAAAGGAATTGACGGGGGCGCCGACAAAGCGGTGGAGCATGTGGTTTAATTCGATGCAACGCGAAGAACCTTACCAGGGCTTGACA
TGTGCGGAACCTCGCGGAACGTGGGGGTGCCCTTCGGGAACGCGAACACAGGTGCTGCATGGCTGTCTGTCAGCTCGTGTCTGAGATGTTGGGT
TAAGTCCCGCAACGAGCGCAACCCCTCGTCTGTCAGTTGCCATCATTCAGTTGGGCACTCTGGCGAGACTGCCGGTGACAAACCGGAGGAAGGTGG
GGATGACGTCAAGTCAGCATGGCTCTTACGTCTCGGTACACACGTGCTACAATGGTTCCGATAAAGGGCTGCAATCCCGCAGGGGGAGGCCA
ATCCCATAAACCGAATCTCAGTTCGGATTGTAGGCTGCAACTCGCCTACATGAAGTCGGAATCGCTAGTAATCGCAGGTGAGCATACTGCGGTG
AATACGTTCCCGGGCCTTGTACACACCGCCGTCACACCATGGGAGCTGGTATGCCCGAAGTCGGTATCCTAACC CGAAGGAGGGAGCCGCCG
AAGGCGGGGCGGTGACTGGGGTGAAGTCGTAACAAGGTAGCCGTACCGGAAGGTGCGGCTGGATCACCTCCTTT
```

> *Gloeobacter violaceus* CCLA 979, 16S rRNA (fragment) obtained using CYA 359F and CYA 781R  
TGTGTGAATTTTCCGCAATGGGCGAAAGCCTGACGGAGCAACGCCGCTGGGTGATGAAGGCCGTGGGTCGTAAAGCCCTTTTGTGAGGG  
ACGGAATCTGACCGTACGTAACCTCAGGAGGGGATAACCGGTGGAACCGCCGCTAATACCCCATATGCCGCAAGGTGAAATCTTTTGTG  
CTGGGGATGAGCTCGCGGTGGATTAGCTAGTTGGTGGGGTAATGGCCTACCAAGGCGACGATCCATAGCTGGTCTGAGAGGATGATCAGCCAC  
ACTGGGACTGAGACACGGCCAGACTCCTACGGGAGGCAGCAGTGGGGAATTTTCCGCAATGGGCGAAAGCCTGACGGAGCAAGACCGCGTGAG  
GGATGAAGGCCTTTGGGTGTGTAACCTCTTTTCTCAGGGAAGAACACATGACGGTACCTGAGGAATAAGCCTCGGCTAACTCCGTGCCAGCAGC  
CGCGGTAAGACCTGAGGAGGCAAGCGTTATCCGGAATTATTGGGCTGCCAGTGAAGCGTCCGCGAGGTGGCTTTCCAACTGCGGCTTACCGGAAAT  
TTAACCTCGGATCGGCGGTGGAACCTGGATCGCTAGAGTGCCTGAGGGGTAGGGGGAATTTCCCGGTGTAGCGGTGAAATGCGTAGATATCGGGA  
AGAACACCAAGTACGAAAGTGCCCTACTGGGACGTTACTGACACTCATGGACGAAAGCTAGGGGAGCGAAAGGGATTAGATACCCCTGTAGTCC  
TAGCCGTAACAGTACGACACTAGGTGTTGCTGGTATCCACTCCAGCAGTGCCGTAGCCAACGCGTTAAGTGTCCCGCTGGGGAGTACGCACGC  
AAGTGTGAAACTCAAAGGAATTTGACGGGGGCGCCGACAAAGCGGTGGAGTATGTGGTTTAATTCGATGCAACGCGAAGAACCTTACCAGGCTTG  
ACATGTGCGGAATCCCGCGGAAACGTGGGAGTGCCCTTCGGGAACGCGAACACAGGTGGTGCATGGCTGTCTGTCAGCTCGTGTCTGAGATGTTG  
GGTTAAGTCCCGCAACGAGCGCAACCCCTCGTCTTAGTTGCCAGCATTAGTTGGGCACTCTAGGGAGACTGCCGGTGACAAACCGGAGGAAGG  
TGGGGATGACGTCAAGTCATCATGCCCCCTTACGTCCTGGGCTACACACGTACTACAATGCTGTGGACAAGAGTTGCCAACCCGCGAGGGCGAG  
CTAATCTCTTAAACCAAGGCTCAGTTGAGTTGAGGCTGCAACTCGCTGCGTACGTGAGGCGGAATCGCTAGTAATCGCAGGTGAGCATACTGCG  
GTGAATACGTTCCCGGGCCTTGTACACACCGCCGTCACACCATGGGAGTTGGCCATGCCCGAAGTCGTTACTCTAACCCGCAAGGGAGGGGGA  
CGCCTAAGGCAGGGCTGATGACTGGGGTGAAGTCGTAACAAGGTAGCCGTACCGGAAGGTGTGGCTGGATCACCTCCTTTT

>ENA|BA000039.2:2335243..2336733:rRNA|BA000039.2:2335243..2336733:rRNA.2 *Thermosynechococcus elongatus* BP-1 16S rRNA

```
AAAATGGAGAGTTTGATCCTGGCTCAGGATGAACGCTGGCGGTCTGCTTAACACATGCAAGTCGAACGAGCACTTCGGTGTAGTGGCGGACGG
GTGAGTAACACGTGAGATCTACCTCAGGAGGGGGATAACCGGTGGAACCGCCGCTAATACCCCATATGCCGCAAGGTGAAATCTTTTGTG
CCTGGGGATGAGCTCGCGGTGGATTAGCTAGTTGGTGGGGTAATGGCCTACCAAGGCGACGATCCATAGCTGGTCTGAGAGGATGATCAGCCAC
ACTGGGACTGAGACACGGCCAGACTCCTACGGGAGGCAGCAGTGGGGAATTTTCCGCAATGGGCGAAAGCCTGACGGAGCAAGACCGCGTGAG
GGATGAAGGCCTTTGGGTGTGTAACCTCTTTTCTCAGGGAAGAACACATGACGGTACCTGAGGAATAAGCCTCGGCTAACTCCGTGCCAGCAGC
CGCGGTAAGACCTGAGGAGGCAAGCGTTATCCGGAATTATTGGGCTGCCAGTGAAGCGTCCGCGAGGTGGCTTTCCAACTGCGGCTTACCGGAAAT
TTAACCTCGGATCGGCGGTGGAACCTGGATCGCTAGAGTGCCTGAGGGGTAGGGGGAATTTCCCGGTGTAGCGGTGAAATGCGTAGATATCGGGA
AGAACACCAAGTACGAAAGTGCCCTACTGGGACGTTACTGACACTCATGGACGAAAGCTAGGGGAGCGAAAGGGATTAGATACCCCTGTAGTCC
TAGCCGTAACAGTACGACACTAGGTGTTGCTGGTATCCACTCCAGCAGTGCCGTAGCCAACGCGTTAAGTGTCCCGCTGGGGAGTACGCACGC
AAGTGTGAAACTCAAAGGAATTTGACGGGGGCGCCGACAAAGCGGTGGAGTATGTGGTTTAATTCGATGCAACGCGAAGAACCTTACCAGGCTTG
ACATGTGCGGAATCCCGCGGAAACGTGGGAGTGCCCTTCGGGAACGCGAACACAGGTGGTGCATGGCTGTCTGTCAGCTCGTGTCTGAGATGTTG
GGTTAAGTCCCGCAACGAGCGCAACCCCTCGTCTTAGTTGCCAGCATTAGTTGGGCACTCTAGGGAGACTGCCGGTGACAAACCGGAGGAAGG
TGGGGATGACGTCAAGTCATCATGCCCCCTTACGTCCTGGGCTACACACGTACTACAATGCTGTGGACAAGAGTTGCCAACCCGCGAGGGCGAG
CTAATCTCTTAAACCAAGGCTCAGTTGAGTTGAGGCTGCAACTCGCTGCGTACGTGAGGCGGAATCGCTAGTAATCGCAGGTGAGCATACTGCG
GTGAATACGTTCCCGGGCCTTGTACACACCGCCGTCACACCATGGGAGTTGGCCATGCCCGAAGTCGTTACTCTAACCCGCAAGGGAGGGGGA
CGCCTAAGGCAGGGCTGATGACTGGGGTGAAGTCGTAACAAGGTAGCCGTACCGGAAGGTGTGGCTGGATCACCTCCTTTT
```

>ENA|AP012205.1:2451003..2452491:rRNA|AP012205.1:2451003..2452491:rRNA.1 *Synechocystis* sp. PCC 6803 16S ribosomal RNA

```
ACAATGGAGAGTTTGATCCTGGCTCAGGATGAACGCTGGCGGTATGCCTAACACATGCAAGTCGAACGGAGTTCTTCGGAACCTTAGTGGCGGAC
GGGTGAGTAACACGTGAGAACCTACCTTCAGAAATGGGGACAAACAGTTGGAACACGACTGCTAATACCCCAATGTGCCGAAAGGTGAAAGATTATC
GTCTGAAGATGGGCTCGGTCTGATTAGTTGGTGGGTGAAGAGCCTACCATGGCAACGATCAGTAGCTGGTCTGAGAGGATGAGCAGCCGA
CACTGGGACTGAGACACGGCCAGACTCCTACGGGAGGCAGCAGTGGGGAATTTTCCGCAATGGGCGAAAGCCTGACGGAGCAATACCGCGTGA
GGGAGGAAGGTCTTGGATTGTAAACCTCTTTTATCAGGGAAGAAGTTCTGACGGTACCTGATGAATAAGCATCGGCTAACTCCGTGCCAGCAG
```

CCGCGGTAATACGGAGGATGCAAGCGTTATCCGGAATTATTGGGCGTAAAGCGTCCGTAGGTGGTTATGCAAGTCTGCCGTTAAAGAATGGAGC  
TAACTCCATAGGAGCGGTGGAACCTGCAAGACTAGAGTACAGTAGGGGTAGCAGGAATCCCAGTGTAGCGGTGAAATGCGTAGATATTGGGA  
AGAACATCGGTGGCGAAAGCGTGCTACTGGGCTGAAACTGACACTGAGGGACGAAAGCTAGGGTAGCGAAAGGATTAGATACCCCTGTAGTCC  
TAGCCGTAACAGTATGGATACTAGGCGTGGCTTGTATCGACCCGAGCCGTGCCGAAGCTAACCGGTTAAGTATCCCGCTGGGAGTACGCACGC  
AAGTGTGAAACTCAAAGGAATTGACGGGGGCCCGCACAGCGGTGGAGTATGTGGTTTAAATTCGATGCAACGCGAAGAACCTTACCAAGGCTTG  
ACATCCCTGGAATCCTGCGGAAACGTGGGAGTGCCTTAGGGAGCCAGGAGACAGGTGGTGCATGGCTGTCGTAGCTCGTGTGATGATGTTG  
GGTTAAGTCCCGCAACGAGCGCAACCCCTCGTTTCTAGTTGCCATCATTAAGTTGGGCACTCTAGAGAGACTGCCGCTGACAAACCGGAGGAAGG  
TGGGGATGACGTCAAGTCATCATGCCCTTACGCCCTTGGGCTACACAGTACTACAATGGTCGGGACAACGGGCAGCGAGCTCGCGAGAGTAAG  
CGAATCCCATCAAACCCGGCCTCAGTTCAGATTGCAGGCTGCAACTCGCTGCATGAAGGAGGAATCGCTAGTAATCGCAGGTGAGAATACTGC  
GGTGAATTCGTTCCCGGGCCTTGTACACACCGCCCGTCACACCATGGGAGCTGGTCACGCCCAAGTCGTTACTCTAACCTTAGGGAGGAGGGC  
GCCGAAGGCAGGCTAGTGACTGGGGTGAAGTCGTAAACAGGTAGCCGTACCGGAAGGTGTGGCTGGATCACCTCCTTT

>ENA|CP000100.1:2658843..2660332:rRNA|CP000100.1:2658843..2660332:rRNA.1 *Synechococcus*  
*elongatus* PCC 7942 16S ribosomal RNA  
CAAAATGGAGAGTTTGTATCTTGCTCAGGATGAACGCTGGCGCGTGCTTAACACATGCAAGTCGAACGGGCTCTTCGGAGCTAGTGGCGGACG  
GGTGAGTAACGCGTGAGAATCTGCCTACAGGACGGGGACAACAGTTGGAACGACTGCTAATACCCGATGTGCCGAGAGGTGAAACATTTATGG  
CCTGTAGATGAGCTCGCTCTGATTAGCTAGTTGGTGGGGTAAGGGCTACCAAGGCGACGATCAGTAGCTGGTCTGAGAGGATGATCAGCCAC  
ACTGGGACTGAGACACGGCCAGACTCCTACGGGAGGCAGCAGTGGGGAATTTCCGCAATGGGCGCAAGCCTGACGGAGCAACGCCGCTGGG  
GGAGGAAGGTTTTTGGACTGTAAACCCCTTTCTCAGGGAAGAAAGAAAGTGACGGTACCTGAGGAATAAGCCTCGGCTAATTCGCTGCCAGCAG  
CCGCGGTAATACGGGAGAGGCAAGCGTTATCCGGAATTATTGGGCGTAAAGCGTCCGCAAGGCGGTTAATCAAGTCTGTTGTCAAAGCGTGGGGC  
TCAACCTCATACAGGCAATGGAACCTGATTGACTAGAGTATGGTAGGGGTAGCGGGAATTCACAGTGTAGCGGTGAAATGCGTAGATATCTGGA  
AGAACCACGCGCGCAAGCGCGCTACTGGGCCATAACTGACCGCTCATGGACGAAAGCTAGGGGAGCGAAAGGGATTAGATACCCCTGTAGTCC  
TAGCCGTAAACGATGAAGTGTGCGTGAATCGAGCGCAGTGCCGCTAGCCAACGCGTTAAGTGTCTGGGCTGGGAGTACGCACGC  
AAGTGTGAAACTCAAAGGAATTGACGGGGGCCCGCACAGCGGTGGAGTATGTGGTTTAAATTCGATGCAACGCGAAGAACCTTACCAGGGTTTG  
ACATCCCCGAATCTCTTGGAAACGAGAGAGTGCTTCCGGAGCGGGGAGACAGGTGGTGCATGGCTGTCGTAGCTCGTGTGATGATGTTG  
GGTTAAGTCCCGCAACGAGCGCAACCCACGTTTTTGTAGTTGCCATCTCAGTTGGGCACTCTAGAGAACTGCCGCTGACAAACCGGAGGAAGG  
TGTGGACGAGCTCAAGTCTAGTACCTTACATCCTGGGCTACACCTACTCAATGCTCCGAGACGCGAAGCCGCGAGGTGAAG  
CAAATCTCCCAACCGGGGCTCAGTTCAGATTGACAGGTGCAACTCGCTGCATGAAGCGGAATCGCTAGTAATCGCAGGTGAGCATACTGCG  
GTGAATAGCTTCCCGGGCCTTGTACACACCGCCCGTCACACCATGGAAGTTGGCCATGCCGAAGTCGTTACCTTAACGCTTCGCGGAGGGGGG  
CGCCGAAGGTAGGGCTGATGACTGGGGTGAAGTCGTAACAAGGTAGCCGTACCGGAAGGTGTGGCTGGATCACCTCCTTT

>ENA|BA000019.2:2500525..2502013:rRNA|BA000019.2:2500525..2502013:rRNA.2 *Nostoc* sp. PCC 7120 =  
FACHB-418 16S rRNA  
AAAACGGAGAGTTTGATCCTGGCTCAGGATGAACGCTGGCGGTATGCTTAACACATGCAAGTCGAACGGTCTCTTCGGAGATAGTGGCGGACGG  
GTGAGTAACGCGTGAGAACTTAGCTTCAGTTCAGGGGACAACACTGGAACCGGTGGCTAATACCGGATGTGCCGAAGGTTGAAAGATTTATTGC  
CTGAAGATGAGCTCGCGTCTGATTAGCTAGTTGGTGTGGTAAGAGCGCACCAAGGCGACGATCAGTAGCTGGTCTGAGAGGATGATCAGCCACA  
CTGGGACTGAGACACGGCCAGACTCCTACGGGAGGCAGCAGTGGGGAATTTCCGCAATGGGCGAAAGCCTGACGGAGCAATACCGCGTGAGG  
GAGGAAGGCTCTTGGGTTGTAAACCTCTTTCTCAGGGAATAAAAAATGAAGGTACCTGAGGAATAAGCATCGGCTAATCCGTGCCAGCAGC  
CGCGGTAATACGGAGAGTGAACGCTTATCCGGAATGATTGGGCGTAAAGCGTCCGAGGTGGCACTGTAAGTGTGTTAAAGAGCAAGGCT  
CAACCTTGTAAAGCGCAGTGGAACCTACAGAGCTAGAGTACGTTTCGGGGCAGAGGGAATTCCTGGTGTAGCGGTGAAATGCGTAGAGATCAGGAA  
GAACACCGGTGGCGAAAGCGCTCTGCTAGGCCGTAACCTGACACTGAGGGACGAAAGCTAGGGGAGCGAATGGGATTAGATACCCAGTAGTCCT  
AGCCGTAACCATGATGACTAGGCGTGGCTTGTATCGACCCGAGCCGTGCCGGAGCCAAACGCGTTAAGTATCCCGCTGGGGATACGCAACGCA  
AGTGTGAAACTCAAAGAACTGACGGGGGCCCGCACAGCGGTGGGATGTGTGTTTAAATTCGATGCAACGCGCAAGCACTTACCAAGACTTGA  
CATGTGCGGAATCTTCTTGAAGGGAAGAGTGCCTTAGGGAGCGCGAAGCAGGTGGTGGTGCATGGCTGTCGTAGCTCGTGTGATGATGTTG  
GTTAAGTCCCGCAACGAGCGCAACCCCTCGTTTTTGTAGTTGCCAGCATTAAGTTGGGCACTCTAGAGAGACTGCCGCTGACAAACCGGAGGAAGGT  
GGGGATGACGCTCAAGTACGATGCCCTTACGCTCTGGGCTACACAGCTACTACAATGCTACGGACAGAGGGCAGCAAGCTAGCGATAGCAAGC  
AAATCCCGTAACCGGTAGCTCAGTTTCAGATCGCAGGTGCAACTCGCTGAGGAGGAATCGCTAGTAATTCGAGGTGAGCATACTGACAG  
TGAATTCGTTCCCGGGCCTTGTACACACCGCCCGTCACACCTGGAAGCTGGCAGCAACGCCGAAGTCATTACTCCAACCTTTTAGGAGAGGAGGAT  
GCCTAAGGCAGTGCTGGTACTGGGGTGAAGTCGTAAACAGGTAGCCGTACCGGAAGGTGTGGCTGGATCACCTCCTTT

>ENA|CP003591.1:235886..237361:rRNA|CP003591.1:235886..237361:rRNA.1 *Geitlerinema* sp. PCC 7407  
16S ribosomal RNA  
AGAGTTTGATCCTGGCTCAGGATGAACGCTGGCGCGTGCTTAACACATGCAAGTCGAACGAAGTCTTCGGACTTAGTGGCGGACGGGTGAGTA  
ACGCGTGAGAATCTGCCCTCAGGAGGGGGATAACAGTTGGAACGACTGCTAAGACCCCATATGCCGAAGGTTGAAATAATTTTTGCTGAGG  
ATGAGCTCGCTCTGATTAGCTAGTTGGTGAAGTGAAGCTACCAAGGCGACGATCAGTAGCTGGTCTGAGAGGATGATCAGCCACACTGGGA  
CTGAGACACGGCCAGACTCCTACGGGAGGCAGCAGTGGGGAATTTCCGCAATGGGCGAAAGCCTGACGGAGCAACCGCGCTGAGGGAGGAA  
GGCCTGTGGGTTGTAAACCTCTTTCTCAGGGAAGAAGATCTGACGGTACCTGAGGAATCAGCATCGGCTAATCCGTGCCAGCAGCCGCGGTA  
AGACGGAGGATGCAAGCGTTATCCGGAATTATTGGGCGTAAAGCGTCCGAGGCGGCTCAGCAAGTCTGCTGTCAAAGAGCGGGGCTCAACTCC  
GTAGGGGCACTGGAACCTGCTGGGCTAGAGTATGGTAGGGGACAGGGAATTCGGGTGTAGCGGTGAAATGCGTAGATATCGGGAAGAACACC  
AGTGGCGAAAGCGCTCTGCTGGGCCATAACTGACGCTCATGGCGCAAGCTAGGGGAGCGAATGGGATTAGATACCCAGTAGTCTTAGCCGTA  
AACGATGGAGACTAGGTGTTGCTTGTATCGACCAAGCAGTGCCGTAGCTAACCGGTTAAGTCTCCCGCTGGGAGTACGCACGCAAGTGTGA  
AACTCAAAGGAATTGACGGGGGCCCGCACAGCGGTGGAGTATGTGGTTAATTCGATGCAACGCGAAGAACCTTACCAGGCTTGACATGTGCG  
CGAACCTGCTGAAAGCGGGGGTGCTACGGGAGCGCGAACAGGTGGTGCATGGCTGTCGTAGCTCGTGTGATGATGTTGGGTTAAGT  
CCCGCAACGAGCGCAACCTCGTTCTTAGTTGCCATCATTAAGTTGGGCACTCTAGGGAGACTGCCGCTGACAAACCGGAGGAAGTGGGATGA  
CGTCAAGTCAGCATGCCCTTACGCTCTGGGCTACACAGTACTACAATGCTTCGGACAGAGGGCAGCAAGCGCGGAGTGAAGCCAATCCCA  
TAAACCGAGGCTCAGTTCAGATTGCAGGCTGCAACTCGCTGCATGAAGCGGAATCGCTAGTAATCGCAGGTGAGCATACTGCGGTGAATACG  
TTCCCGGGCCTTGTACACACCGCCCGTCACACCATGGGAGCTGGCCACGCCCAAGTCGTTACTCTAACCGTTTCGCGGAGGAGGACGCCGAAGG  
CAGGCTGGTGACTGGGGTGAAGTCGTAAACAGGTAGCCGTACCGGAAGGTGTGGCTGGATCACCT

>2663544969 16S rRNA. Bacterial SSU [Oscillatoria limnetica bin re-assembly (V2) :  
Ga0115370\_1063] (+) strand  
ACACCAGGAGAGTTTGATCCTGGCTCAGGATGAACGCTGGCGGTGCGGCTTAACACATGCAAGTCGAACGGGTTCTTCGGAACCAAGTGGCGGAC  
GGGTGAGTAACACGTGAGAACCTGCCTACCGGAGGGGGATAACAGCGGGAACCTGCTGCTAATACCCCATACGCCGAGAGGTAAAAGGTACGCC  
GCCGGGAGAGGGGCTCGCGTCCGATTAGCTAGTTGGTGGGGTAAGAGCTACCAAGGCGACGATCGGTAGCCGTTTTGAGAGGAAGAACGGCCA  
CACTGGGACTGAGACACGGCCAGACTCCTACGGGAGGCAGCAGTGGGGAATCTTCGCAATGGGCGCAAGCCTGACGGAGGCCAGACCGCGTGG  
GGGAGGAAGGCCCTTGGGTTGTAAACCCCTTTTCTCAGGGAAGAAACCTGACGCTACCTGAGGAAAAAGCCTCGGCTAACTCCGTGCCAGCAGC  
CGCGGTAATACGGAGGAGGCAAGCGTTATCCGGAATTACTGGGCGTAAAGCGTTCTGAGGGGCTCGTCAAGTCTGCTGTCAAAGCTCGGAGCT

CAACTCCGAAGGGGCAGTGGAAACTGGGGAGCTAGAGGGCGGCAGGGGCAGAAAGGAATTCCCCGGTGTAGCGGTGAAATGCGTAGAGATCGGGAA  
GAACACCAGAGGCGAAAGCGTTCTGCTGGGCCGCGCCTGACCCCTGAGGGACGAAAGCCAGGGGAGCGAATGGGATTAGATACCCACAGTAGTCCT  
GGCTGTAAACGATGGATAGTATTGGCCGTATCGACCCGCTCGGCCCGGAAAGCTAACGCGTTAAGTATCCCGCCTGGGGAGTACGCACGCA  
AGTGTGAAACTCAAAGGAATTGACGGGGGCCCGCACAAAGCGGTGGAGTATGTGGTTTAAATTCGATGCAACGCGAAGCACCTTACCAGGGCTTGA  
CATGCCCGGAACCCAGGGAACCTTGGGGGTGCTACGGGAGCGCGGACACAGGTGGTGCATGGCTGTGCTCAGCTCGTGTGCTGAGATGTTGG  
GTTAAGTCCCGCAACGAGCGCAACCCTCGTCCTTAGTTGCCAGCATTAGTTGGGCCCTCTAGGGAGACTGCCGGTGACAAACCCGGAGGAAGGT  
GGGATGACATTCAAGTCATAGCCCTTATGCCCTGGGCGACACACGTACTACAATGGTTGGGACAGAGGGAAGCGAAAGCCGCGAGGTGGAGC  
CAATCCCACAAACCCAGCCTCAGTTCAGATTGCAGGCTGCAACTCGCCTGCATGAAGGCGGAATCGCTAGTAATCGCCGGTCAGCATACGGCGG  
TGAATACGTTCCCGGGCCTTGTACACACCGCCGTCACACCATGGAAGCTGGCCACGCCCGAAGTCGTTACTCCAACCCCTGAGGGGAGGAGGAC  
GCCGAAGGCAGGGCTGGTGAAGTTCGTAACAAGGTAGCCGTACCGGAAGGTGTGGCTGGATCACCTCCTTTA

> Geitlerinema sp. ZHRIa, 16S rRNA (fragment) obtained using CYA 359F and CYA 781R  
TGTGGGAATTTTCCGCAATGGGCGAAAGCCTGACGGAGCAATACCGCGTGAGGGACGAAGGCCTGTGGGTTGTAAACCTCTTTTCT  
CAGGGAAGAAGATCTGACGGTACCTGAGGAATCAGCATCGGCTAACTCCGTGCCAGCAGCCGCGGTAAGACGGAGGATGCAAGCGT  
TATCCGGAATTTATGGCGTAAAGCGTCCGACGGCGTTCGTAAGCTGTCTCTTTAAAGCGTGAGGCTTAACCTCATTAAGCCGAGGTGGAGC  
GGAAACTGCGAGACTAGAGGTAGGTAGGGGTAGAAGGAATTTCCAGTGTAGCGGTGAAATGCGTAGATATTGGGAAGAACCACAGC  
AGCGAAGGCGTTCTACTGGACCAACCTGACGCTCATGGACGAAAGCTAGGGGAGCGAAWGGGATTAGATACCCCWGTAGTCAA

>ENA|HE974210.1:257..1733:rRNA|HE974210.1:257..1733:rRNA.1 Microcystis aeruginosa PCC 9701  
ribosomal RNA 16s ribosomal RNA  
AGAGTTTGATCTGGCTCAGGATGAACGCTGGCGGCGTGCCTAACACATGCAAGTCGAACGGGAATCTTCGGATTCTAGTGGCGGACGGGTGAG  
TAACGCGTAAGAATCTAATCTCAGGACGGGGACAACAGTTGGAACAGACTGCTAATACCCGATGTGCCGCAAGGTGAAACCTAATTTGGCCTGAA  
GAAGAGCTTGCGTCTGATTAGTGTGGGTAAAGCCCTTCCAGGCGAGGATCAGTAGCTGGTCTGAGAGGATGACAGCCACACTGGG  
ACTGAGACACGGCCAGACTCCTACGGGAGGACGAGTGGGGAATTTTCCGCAATGGGCGAAAGCCTGACGGAGCAACGCCGCGTGAGGGAGGA  
AGGTCTTTGGATTGTAAACCTCTTTTCTCAAGGAAGAAGTTCTGACGGTACTTGAGGAATCAGCCTCGGCTAACTCCGTGCCAGCAGCCGCGGT  
AATACGGGGGAGGCAAGCGTTATCCGGAATTTATGGGCGTAAAGCGTCCGAGGTGGTTCAGCCAAAGTCTGCTGTCAAATCAGGTTGCTTTAACGA  
CCTAAGGCGGTGGAAAGCTGGACGATAGAGAGCAGTGAAGCAATTTCCAGTGTAGCGGTGAAATGCGTAGATGTTGGGAAGAACAT  
CGGTGGCGAAAGCGTGTACTGGGCTGTATCTGACACTCAGGGACGAAAGCTAGGGGAGCGAAAGGGATTAGATACCCCTGTAGTCTTAGCCGT  
AAACGATGGATAGTAGGCGTGGCTTGTATCGACCCGAGCCGTGCCGAAGCTAACGCGTTAAGTATCCCGCCTGGGGAGTACGCACGCAAGTGTG  
AAACTCAAAGGAATTGACGGGGGCCCGCACAAAGCGGTGGAGTATGTGGTTTAAATTCGATGCAACGCGAAGAACCTTACCAAGACTTGACATGTC  
GCGAACCTTGGTGAAGCTGGGGGTGCCCTTCGGGAGCGCGAACACAGGTGGTGCATGGTGTGCTCAGCTCGTGTGCTGAGATGTTGGGTTAAG  
TCCCGCAACGAGCGCAACCCCTCGTTCTTAGTTGCCAGCATTAAGTTGGGGAAGTCTAAGGAGACTGCCGGTGACAAACCGGAGGAAGGTGGGGAT  
GACGTCAGTCAAGTCAGCATGCCCCCTACGCTCTGGGCGACACAGTACTACAATGGTTCGGGACAAAGGGCAGCGAACTCGCGAGAGCCAGCGAATCC  
CAGCAAAACCCGGCCTCAGTTCAGATTGCAGGCTGCAACTCGCCTGCATGAAGGCGGAATCGCTAGTAATCGCCGGTCAGCATACGGCGGTGAAT  
TCGTTCCCGGGCCTTGTACACACCGCCGTCACACCATGGAAGCTGGTCAAGCCGAAAGTCAATTACCTCAACCGCAAGGAGGGGGATGCCTAAG  
GCAGGGCTAGTGACTGGGGTGAAGTCGTAACAAGGTAGCCGTACCGGAAGGTGTGGCTGGATCACCT

>ENA|CP003607.1:2196585..2197955:rRNA|CP003607.1:2196585..2197955:rRNA.1 Oscillatoria  
acuminata PCC 6304 16S ribosomal RNA  
CTGGCTCAGGATGAACGCTGGCGGTCTGCTTAACACATGCAAGTCGAACGGTGAACCCCTCGGGTTCATAGTGGCGGACGGGTGAGTAACACGTG  
AGAATCTGCCTCCAGGTGGGGACAACAGTGGGAACTGCTGCTAATACCCGATGTGCCTACGGGTGAAAGATTAATTGCTGGAGATGAGCTC  
CGCTCCGATTAGCTAGTTGGTAGAGTAAAGCCTACCAAGCGACGATCGGTAGCTGGTCTGAGAGGATGAGCAGCCACACTGGGACTGAGACA  
CGGCCAGACTTCCTGAGCGAGCAGTGGGGAATTTCCGCAATGGGCGAAAGCCTGACGGAGCAAGACCCGCTGGGGATGAGAGGCTTTG  
GGTTGTAAACCCCTTTTCTCAGGGAAGAATAAATGACGCTAGCTAGGGAATAAGCATCGGCTAACTCCGTGCCAGCAGCCGCGGTAAAGACGGAG  
GATGCAAGCGTTATCCGGAATTATTGGGCGTAAAGCGTTCGTAGGTGGCTGTTCAAGTCTGCCGTTAAAGACCGGGGCTTAACCTCCGGAAC  
TGTGGAACCTGAACAGCTAGAGTATGGTAGGGGTAAAGGGAATTTCCCGTGTAGCGGTGAAATGCGTAGATATCGGGAAAGAACCCGTTGGCG  
AGGCGCTTACTGGGCGATACTGACACTGAGGACGAAAGCTAGGGGAGCGAAAGGATTAGATACCCCTGTAGTCTAGTCTGTAACAGTAGG  
ATACTAGTGTGTGCCCCGTATCGACCCGGCAGTGCCGTAGCTAACGCGTTAAGTATCCCGCCTGGGGAGTACGCACGCAAGTGTGAAACTCAAA  
GGAATTGACGGGGGCCCGCACAAAGCGGTGGAGTATGTGGTTTAAATTCGATGCAACGCGAAGAACCTTACCAGGGCTTGACATGTCCAGAATCTT  
GGGGAACCTAAGAGTGCTTCCGGAGCTGGAACACAGGTGGTGCATGGCTGTGCTCAGCTCGTGTGCTGAGATGTTGGGTAAAGTCCCGCAAC  
GAGCGCAACCCCTCGTCTTAGTTGCCATCATTAAGTTGGGCACTTTAGGGAGACTGCCGGTGACAAACCGGAGGAAGGTGGGGATGACGTCAG  
TCAGATGCGCCCTTACGCTTCCGCTACACAGTACTACATGGAAGTGAAGGAGGAGGCTAGCAAGCGCGCGAGTGAAGCAATCCATAAACCT  
TTCTCAGTTCAGATTGAAGTTTCAACTCAACTTCATGAAGCGGAATCGCTAGTAATCGCAGGTGACGATACTGCGGTGAATACGTTCCCGG  
GCCTTGTACACACCGCCGTCACACCATGGAAGTTGGCCATGCCCGAAGTCATTA

>J01395.1:223-1714 Chlamydomonas reinhardtii 16S ribosomal RNA gene, complete sequence;  
ATCCATGGAGAGTTTGATCCTGGCTCAGGACGAACGCTGGCGGCATGCTTAACACATGCAAGTCGAACGAGCAAGCAATTTGTGTAGTGGCGA  
ACGGGTGCGTAACGCGTAAGAACCTACCTATCGGAGGGGGATAACATTGGGAAACTGTTGCTAATACCCCATACAGCTGAGGAGTGAAAGGTGA  
AAAACCGCCNGATAGAGGGGCTTGCGTCTGATTAGCTAGTTGGTGGGGGTAAACGGCCTCCCAAGGCCACGACAGTAGCTGGTCTGAGAGGATG  
ATAGCCCACTGGGACTGAGACACGGCCAGACTCCTACGGGAGCGACAGTGAAGGAATTTTCGCAATGGGCGCAAGCGACGGAGCAATGCC  
GCGTGCAGGAAGAAGCCTGTGGGTCGTAAACTGCTTTTCTCAGAGAAGAAGTTCTGACGGTATCTGAGGAATAAGCACCGGCTAACTCTGTGC  
CAGCAGCCGCGGTAATACAGAGGGTGCAAGCGTTGTCCGCAATGATTGGGCGTAAAGCGTCTGTAGGTGGCTCGTAAAGTCTAATGTCAAATAC  
CAGGGCTCAACCTTGACCGGCATTGGAGTACTCACAGGCTTGAGTACGGTAGGGGACAGAGGAATTCATGTGGAGCGGTGAAATGCGTAGAG  
ATATGGAGGAACACCAAGTGGCGAAGGCGCTCTGCTGGGCGAAACTGACACTGAGAGACGAAAGCTGGGGGAGCGAATAGGATTAGATACCCCTA  
GTAGTCCCAGCCGTAAACTATGGAGACTAAGTCTGCCGAAGCAGTGTGTAGCTAACGCGTTAAGTCTCCCGCTGGGGAGTATGCTCGCAA  
GAGTGAACCTCAAAGGAATTGACGGGACCGCACAAAGCGGTGGATTATGTGGATTAAATTCGATACAACGCGAAGAACCTTACCAGGGTTTGACAT  
TCAAGAANCCTCTCAGAAATGGGAGGGTGCCCTAACGGACTTGAACACAGGTTGGTGCATGGCTGTGCTCAGCTCGTGTGAGTGTATAGT  
TAAGTCTCATAACGAGCGCAACCTCGTCTTTAGTTGCCATTNNNNNNNTGGTTCTCTTAAAGAGACTGCCAGTGTGAGGAGGAGGTGA  
GGATGACGTCAGTCAAGTCAGCATGCCCTTACATCCTGGGCTTACACGTAATACAATGGTTGGGACAATCAGAAGCGANCTCGTGAGNNNNAGCTA  
GCGGCTCTGTTAAACCCAACCTCAGTTCGGATTGTAGGCTGCAACTCGCTACATGAAGCCGGAATCGCTAGTAATCGCCAGTCAGCTATATGG  
CGGTGAATACGTTCCCGGGTCTTGTACACACCGCCGTCACACCATGGAAGCTGGTTCTGCTCCAAGTCGTTACCCTAACCTTCGGGAGGGGGG  
CNNGCCTAAAGCAGGGCTAGTGACTAGGGTGAAGTCGTAACAAGGTAGGGCTACTGGAAGGTGGCCCTGGCTCACCTCCTTC

>ENA|GU084820.1:229350..230840:rRNA|GU084820.1:229350..230840:rRNA.1 Volvox carteri f.  
nagariensis 16S ribosomal RNA  
ATCCATGGAGAGTTTGATCCTGGCTCAGGACGAACGCTGGCGGCATGCTTAACACATGCAAGTCGAACGAGCATTAAATTTTAAATGTGTAGTG  
GCGAACGGGTGCGTAACGCGTAAGAACCTACCTATCGGAGGGGGATAACATTGGGAAACTGTTGCTAATACCCCATAAAGCTGAGGAGTGAAA

GGTGTA AAAACCGCCGATAGAGGGGCTTGCCTCTGATTAGCTAGTTGGAGGGGGTAATGGCCTCCCAAGGCCACGATCAGTAGCTGGTCTGAGAG  
GATGATCAGCCACACTGGGACTGAGACACGCGCCAGACTCCTACGGGAGGCAGCAGTGAGGAATTTTCGCAATGGGCGAAAGCCTGACGAAGC  
AATGCCCGGTGACGGAAGAAGGCTGTGGGTCTGTAAGCTGCTTTCTTTAGAGAAAGTAAGTCTGACGGTATCTGAGGAATAAGCACGGCTTAACC  
CTGTGCCAGCAGCCGCGGTAATACAGGGGGTGCAAGCGTTGTCCGGAATGATTGGGCGTAAAGCGTCTGTAGGTGGCTCGTAAAGTCTAATGTC  
AAATACAGGGCTCAACCTTGGATCGGCATTAGAGCACTCACGAGCTTGAGTACGGTAGAGGCAGAGGGAACCTCAAGTGGAGCGGTGAAATGC  
GTAGAGATTTGGAAGAACACCAGAGGCGAAGGCGCTCTGCTGGGCCGAACTGACACTGAGAGACGAAAGCTGGGGGAGCGAATAGGATTAGAT  
ACCCTAGTAGTCCCAGCGTAAACTATGGAGACTAAGTGTCTGCCGAAGCAGTGTCTAGCTAACGCGTTAAGTCTCCCGCTGGGGAGTATGC  
TCGCAAGAGTGAAACTCAAAGGAATTGACGGGGACCCGCACAAGAGGTGGATTATGTGGATTAATTCGATGCAACGCGAAGAACCTTACCAGGG  
TTTGACATGTCAAGAACTTCCCAGAAATGGGAGGGTGCCCTAACGGGAGCTTGAACACAGGTGGTGATGGCTGTCGTCAGCTCGTGCCGTGAG  
GTGTATAGTTAAGTCTCATAACGAGCGCAACCTCTGCTTTAGTTGCCATTTGGTTCTCTAAAGAGACTGCCAGTGTAAGCTGGAGGAAGGTGA  
GGATGACGTCAAGTCAGCATGCCCTTACACCTGGGCTTACACAGTGAATACCAATGGTTGGGAACAATCAGAAGCGATCTCGTGAGAGCTAGCGG  
ATCTGTTAAACCAACCTCAGTTCGGATTGTAGGCTGCAACTCGCCTACATGAAGCCGGAATCTCTAGTAATCGCCAGTCAGCTATATGGCGGT  
GAATACGTTCCCGGGTCTTGTACACACCGCCCGTCACAGGCCGAAAATTAACCTCAACTTAAGCAGTGAGCTGAACTGCAAAGCAGGACGGGA  
GCTACCACAGTGGGGTTAGTAATTGATCTGAAGTCGTAACAAGGTAGGGCTACTGGAAGGTGGCCCTGGATCACCTCCTTC

>ENA|AF170718|AF170718.1 Galdieria sulphuraria strain SAG 107.79 culture-collection SAG:107.79  
16S small subunit ribosomal RNA gene, partial sequence; plastid.  
TGTGCTGCAGAGAGTTTGATCCTGGCTCAGGATTAACGCTGGCGGTATGCCTAACACATGCAAGTCGTACGAGAATTTATTCTAGTGGCGGAC  
GGTGAGTAACACGTGAGAATCTACCTTAGGAGGGGATGCAAGCGTTATCCGGAATACAGCGTCTGAGGTGGTTTCAAGTCAAGTCTGAGGATGATC  
TATCTGCCTGGAGATGAGCTCGCGGCTGATTAGCTAGTTGGTAGGGTAATGGCTTACCAAGGCAACGATCAGTAGCTGGTCTTAGAGGATGATC  
AGCCACACTGGAAGTGAATATGGTCCAGACTCCAACGGGAGGCAGCAGAGGGGAATTTCCACAATGGGCGAAAGCCTGATGGAGCAATACCG  
TGTGAGGGATGAAGGCCCTGTGGGTTGTAACCTCTTTTTTCAGGAAAGAACTTTGACGGTACCTGAAGAATAAGCATCGGCTAACTCCGTGCC  
AGCAGCCGCGGTAAATCAGGAGGATGCAAGCGTTATCCGGAATACAGCGTCTGAGGTGGTTTCAAGTCAAGTCTGAGGATGATCAGGATGATC  
GAGGCTTAACCTCAAAAAAGCAGTGGAAGCTGATAGACTAGAGAATGGTAGGGGCAGAGAGAATTTCTCAGTGTAGCGGTGAAATGCGTAGATAT  
TGAGAAGAATACCGATAGCGAAGGCGCTCTGCTGGGCCATTACTGACACTCAGAGACGAAAGTTAGGGGAGCAATGGGATTAGATACCCAGT  
AGTCTAGCCGTAAACTATGGATACTAGATGTTGTGTGAGTAAATTTGTCAGTATCGAAGCTAACGCGTTAAGTATCCCGCCTGGGAAGTACG  
CTCGCAAGAGTGAAGCTCAAAGGAATTTGACGGGACCGCGCAAGCGGTGGAGAGATGTGGTTAATTTCGATGCAACGCGAAGAACCTTACCAGG  
ACTTGACATGTTACTAATTTCTTGAAGAGGAAAGTGCCCTTTGGGAAAGTAAACACAGGTGGTGATGGCTGTCGTCAGCTCGTGTCTGTGAGA  
TGTTGGGTTAAGTCCCGCAACGAGCGCAACCTTTGTCTTTAGTTACCATCATTAAAGTTGGGGACTCTAAAGAGACTGCCGGTGATAAACCGGAG  
GAAGGTAAAGGATGAGGTCAAGTCATCATGCCCTTATGTCTGGGCTACACACGTGCTACAATGGTTAGGACAATAAGTCGCAAAATTCGTGAGA  
ACTAGCTAATCTTATAAACCTAATCTCAGTACGGATTGTAGGCTGCAACTCGCCTACATGAAGACGGAATCGCTAGTAATCGCTGGTCAGCTAC  
ACAGCGGTGAATACGTTCCCGGGTCTTTGTACACACCGCCCGTCACACCATGGGAGCTGGCCATGTCCGAAATCATTAACCTTAATGGAG  
GAGGATGCTTAAGGCAGGGCTAGTGACTGGG

>ENA|AP012987.1:208682..210168:rRNA|AP012987.1:208682..210168:rRNA.1 Porphyridium purpureum  
16S small subunit ribosomal RNA  
ATACCATGGAGAGTTTGATCCTGGCTCAGGATGAACGCTGGCGGTATGCTTAACACATGCAAGTCGTACGAAAACCTTCGGTTTTAGTGGCGGAC  
GGTGAGTAACACGTGAGAATCTGCCTTTAGGAGGGGGATAACAACTAGAAATGGTTGCTAATACCCCATATGCCGCAAGGTGAAACAGTTTTTC  
TGCCCTAAGAAGACTTCGCGTCTGATTAGCTTGTGGTAGGTAATGGCTCACCAAGGCGAGATCAGTAGTTGGTCTGAGAGGATGGCCAGCC  
ACACTGGGACTGAGACACGCGCCAGACTCCTACGGGAGGCAGACGTGGGAATTTTCCGCAATGGGCGAAAGCCTGACGAGCAATACCCGCTG  
AGGGATGAAGGCTCGTGGGTTGTAACCTCTTTTCTCAGGAAAGAAGTTCTGACGGTACCTGAGGAATAAGCATCGGCTAACTCCGTGCCAGCA  
CCCGCGGTAAATACGGGGGATGCAAGCGTTATCCGGAATCACTGGGCGTAAAGCGTCTGTAGGTTGTTTCAAGTCTAATGTTAAAGACTAGGG  
CTCAACCTGGAAAAGTGAACACTACTAGACTAGATGTGATGAGGTAGAGGGAATTTCCAGTGTAGCGGTGAATGCTGATGATATTTGGG  
AAGAACCACGATGGCGAAGGCGCTTACTGGGCCATACTGACACTGAGAGACGAAAGCTAAGGAGCGAATAGGATTAGATACCTAGTAGTC  
TTAGCTGTAACGATGGATACTAGATGTTGCGTGTTTTTTTCATGCAGTGTCTGAGCTAACGCGTTAAGTATCCCGCCTGGGGAGTATGCTCGCA  
AGGGTGAACCTCAAAGGAATTGACGGGGGCCCCGACAAAGCGGTGGAGCATGTGGTTTAAATTTGATGCAACGCGGAGAACCTTACCAGAACTTGA  
CATATCATGAATCTTTAATATGTAAGAGTGTCTTCGGAAACATGAATACAGTGGTGCATGGCTGTCGTCAGCTCGTGTGAGATGTTGG  
GTTAAGTCCCGCAACGCGCAACCTTGTCTTTAGTTGCCATCATTAAGTTGGGACTCTAAAGAGACTGCCGGTGACAACCGGAGGAAGGT  
GGGGATGACGTCAAGTCAGCATGCCCTTACGTTCTGGGCTACACACGTGCTACAATGGTTAGAACAAAGAGTTGCAAACTTGTGAAAGTAAGC  
TAATCTCATAAATCTAGCCTCAGTTTCAATTGTAGGCTGAAACTCGCCTACATGAAGGTGGAATCGCTAGTAATCGCCGCTCAGCTACACGGCG  
GTGAATTCGTTCCCGGGCCTTGTACACACCGCCCGTCACACCATGGAAGCTGGCTATGCCAAAGTCGTTACTCTAACCGTAAGGAGGGGGGCG  
CCTAAGGCAGAGCTAGTGACTGGGGTGAAGTCGTAACAAGGTAGCCGTAAGTGAAGGTGCGGCTGGATCACCTCCTT

>X12742.1 Chlorella ellipsoidea chloroplast 16S rDNA  
TTTCATGGAGAGTTTCGATCCTGGCTCAGGATGAACGCTGGCGGATGCTTAACACATGCAAGTCGAACGGAGGTTTGCTTTTTTTAAGCTTAG  
GTTAAAAAAAAGTAAATCTTATGTGGCGGACGGGTGAGTAACGCGTAAGAACCTTACCTTTAGGCGGGGACAACTGGAACGGTTGCTAAT  
ACCCCATAAAGCTGAGGAGTAAAGGAATACTATTCTGTCTAAAGATGGGCTTGCCTCTGATTAGCTTGTGGTGAGGTAATTGCTTACCAAGGC  
AACGATCAGTAGTGGTCTGAGAGGATGATCAGCCACACTGGGACTGAGACACGGCCAGACTTCTACGGAAGGCAGCAGTGAGGAATTTTCCG  
CAATGGGCGAAAGCTGACGGAGCAATGCCGCGTGGAGGATGACAGCCTGTGGGTCGTAAACTCCTTTTCTCAGAGAAGAAGTTCTGACGGTATC  
TGAGGAATAAGCATCCCGCTAAGTCCGTCGCCAGCAGCCGCGGTGAAGCAGGAGGATGCAAGCGTTATCCGGAATGATTGGGCGTAAAGCGTCTGTA  
GGTGGTTTTAATAGTCTACTGTTAAAGATCAGGGCTTAACCTTGAGTCGGCAGTAGAACTAATGAGCTTGAGTACGGTAGGGGCAGAGGGAAT  
TCCGGGTTGAGCGGTGAAATGCGTAGAGATCGGGAAGAACCAATGGCGAAAGACTCTGCTGGGCCGAACTGACACTCAGAGACGAAAGCTA  
GGGGAGCGAATGGGATTAGATACCCCACTAGTCTAGCCGTAAACGATGGATACTAAGTGTCTGTCGACTCAAACGCTCCAGTACTGTAGCTAA  
CGCGTGAAGTATCCCGCTGGGAGTATGCTCGCAAGATGAAACTGAGGAGGATGCAAGCGTTATCCGGAATGATTGGGCGTAAAGCGTCTGTA  
TTGATGCAACGCGAAGAACCTTACCAGGGCTTGACATGCCATTTAATCTCTTGAAGAGAGATTTTGAAGTCTGCTTTGACAAAGTTGGGT  
GGACACAGGTGGTGATGGCTGTCGTCAGCTCGTGTGAGATGTTGGGTAAAGTCCCGCAACGAGCGCAACCTTGTTTTTAGTTGCTTTTA  
AAATATACAATTTAAAGGAATGCAAGCATAACTTCGCATACTTTAGTATGTGAAGGAACTACAAAGACTGCCGGTGATAAGCCGGAGGAAG  
GTGAGGATGACGCTAAGTCAGCATGCCCTTATGCCCTGGGCGACACGTCGATGCAATGAGGAGGATGCAAGCGTTATCCGGAATGATTGGGCGTAAAGCGTCTGTA  
GCTAACCTCAAAAACCTGGTCTCAGTTCGGATTGCAGGCTGCAACTCGCCTGCATGAAGTCGGAATCGCTAGTAATCGCTGGTCAGCCATACAG  
CGGTGAATACGTTCCCGGGCCTTGTACACACCGCCCGTCACACTACCAGAGTCGGCTTGCCCAAGTCGTAACCTTCAACCTTCGGGAAGAGAG  
CGCCTAAGGCAGGCTGGTAATGAGAGTGAAGTCGTAACAAGGTAGCCGTAAGTGAAGGTGCGGCTGGATCACCTCCTTA

>ENA|AJ400848.1:134008..135498:rRNA|AJ400848.1:134008..135498:rRNA.1 Spinacia oleracea  
(spinach) 16S ribosomal RNA  
TCTCATGGAGAGTTTCGATCCTGGCTCAGGATGAACGCTGGCGGATGCTTAACACATGCAAGTCGGACGGGAAGTGGTGTTCAGTGGCGGAC  
GGGTGAGTAACGCGTAAGAACCTTGCCTTTGGGAGGGGAACAACAGCTGGAAACGCTGCTAATACCCCGTAGGCTGAGAAGCAAAAGGAGGAAT  
CCGCCCCAGGAGGGGCTCGCTCTGATTAGCTAGTTGGTGAGGTAATAGCTTACCAAGCGATGATCAGTAGCTGGTCCGAGAGGATGATCAGC



CACACTGGGACTGAGACACGGCCCCAGACTCCTACGGGAGGCAGCAGTGGGGAATTTTCCGCAATGGGCGAAAGCCTGACGGAGCAATGCCGCGT  
GGAGGCAGAAAGCCCCACGGGTCGTGAACCTCTTTTCCCGGAGAAGAAGCAATGACGGTATCCGGGGAATAAGCATCGGCTAACTCTGTGCCAGC  
AGCCCGGTAAAGACAGAGGATGCAAGCGTTATCCGGAATGATTGGGCGTAAAGCGCTCTGTAGGTGGCTTTTAAAGTCCGCGGTCAAATCCCGAGG  
GCTCAACCCTGGACAGGCGGTGGAAACTACCAAGCTGGAGTACGGTAGGGGCAGAGGGAATTTCCGGTGGAGCGGTGAAATGCGTAGAGATCGG  
AAAGAACACCAACGGCGCAAGCACTCTGCTGGCCGCACTGACACTGAGAGACGAAAGCTAGGGGAGCGAATGGGATTAGATACCCACAGTAGT  
CCTAGCCGTAAACGATGGATACTAGGCGCTGTGCGTATCGACCCGTGCAGTGTGTAGCTAACGCGTTAAGTATCCCGCTGGGGAGTACGTTT  
GCAAGAATGAAACTCAAAGGAATTGACGGGGGCCCCGACAAAGCGGTGGAGCATGTGGTTAATTTCGATGCAAAGCGAAGAACCTTACCAGGGCT  
TGACATGCCGCGAATCCTCTTGAAGAGAGGGGTGCCTTCGGGAACGCGGACACAGGTGGTGCATGGCTGTCGTAGCTCGTGCCGTAAGGTGT  
TGGGTTAAGTCCCGCAAGCAGGCGCAACCCCTCGTGTTTAGTTGCCAACGTTGAGTTTGGAAACCCGTAACAGACTGCCGGTGATAAGCCCGAGGAA  
GGTGAGGATGACGTCAAGTCATCATGCCCTTATGCCCTGGGCGACACACGTGCTACAATGGCCGGGACAAAGGGTCGCGATCCCGCGAGGGTG  
AGCTAACCCCAAAAACCCGTCCTCAGTTTCGGATTGCGAGGTCGCAACTCGCCTGCATGAAGCCGGAATCGCTAGTAATCGCCGGTCAGCCATACG  
GCGGTGAATTCGTTCCCGGGCCTTGTACACACCCGCCGTCACACTATGGGAGCTGGCCATGCCCGAAGTCGTTACCTTAACCGCAAGGAGGGGG  
ATGCCGAAGGCAGGGCTAGTGACTGGAGTGAAGTCGTAACAAGGTAGCCGTACTGGAAGGTGCGGCTGGATCACCTCCTTT

>ENA|M82900|M82900.1 *Nicotiana plumbaginifolia* 16S rRNA gene.

TCTCATGGAGAGTTTCGATCCTGGCTCAGGATGAACGCTGGCGGCATGCTTAACACATGCAAGTCGGACGGGAAGTGGTGTTCAGTGGCGGAC  
GGGTGAGTAACCGGTAAAGAACCTGCCCTTGGGAGGGGAACAACAGCTGGAACCGGCTGCTAATACCCCGTAGGCTGAGGAGCAAAAGGAGGAAT  
CCGCCCCGAGGAGGGGCTCGCGTCTGATTAGCTAGTTGGTGAGGCAATAGCTTACCAAGCGCATGATCAGTAGCTGGTCCGAGAGGATGATCAGC  
CACACTGGGACTGAGACACGGCCAGACTCCTACGGGAGGCAGCACTCGGTAATTTTCCGCAATGGGCGAAAGCTAGGGGAGCGAATGCGTAGAGATCGG  
GGAGGTAGAAGGCCACGGGTCGTGAACCTCTTTTCCCGGAGAAGAAGCAATGACGGTATCTGGGGAATAAGCATCGGCTAACTCTGTGCCAGC  
AGCCCGGTAAACAGAGGATGCAAGCGTTATCCGGAATGATTGGGCGTAAAGCGTCTGTAGGTGGCTTTTAAAGTCCGCGGTCAAATCCCGAGG  
GCTCAACCCTGGACAGGCGGTGGAAACTACCAAGCTGGAGTACGGTAGGGGCAGAGGGAATTTCCGGTGGAGCGGTGAAATGCGTAGAGATCGG  
AAAGAACAACCAACGGCGCAAGAGCACTCTGCTGGGCCGACACTGCTGGGAGCAAGCTAGGGGAGCGAATGCGTAGATAGATGACGATGCGT  
CCTAGCCGTAAACGATGGATACTAGGCGCTGTGCGTATCGACCCGTGCAGTGTGTAGCTAACGCGTTAAGTATCCCGCTGGGGAGTACGTTT  
GCAAGAATGAAACTCAAAGGAATTGACGGGGGCCCCGACAAAGCGGTGGAGCATGTGGTTAATTTCGATGCAAAGCGAAGAACCTTACCAGGGCT  
TGACATGCCCGCAATCCTCTTGAAGAGAGGGGTGCCTTCGGGAACGCGGACACAGGTGGTGCATGGCTGTCGTAGCTCGTGCCGTAAGGTGT  
TGGGTTAAGTCCCGCAAGCAGGCAACCCCTCGTGTTTAGTTGCGATGCGCTTGGAGTTTGGAAACCCGTAACAGACTGCCGGTGATAAGCCCGAGGAA  
GGTGAGGATGACGTCAAGTCATCATGCCCTTATGCCCTGGGCGACACACGTGCTACAATGGCCGGGACAAAGGGTCGCGATCCCGCGAGGTGA  
GCTAACCCCAAAAACCCGTCCTCAGTTTCGGATTGCGAGGTGCAACTCGCCTGCATGAAGCCGGAATCGCTAGTAATCGCCGGTCAGCCATACGG  
CGGTGAATTCGTTCCCGGGCCTTGTACACACCCGCCGTCACACTATGGGAGCTGGCCATGCCCGAAGTCGTTACCTTAACCGCAAGGAGGGGG  
TGCCGAAGGCAGGGCTAGTGACTGGAGTGAAGTCGTAACAAGGTAGCCGTACTGGAAGGTGCGGCTGGATCACCTCCTTT

>ENA|AP000423.1:101012..102502:rRNA|AP000423.1:101012..102502:rRNA.1 *Arabidopsis thaliana*  
(thale cress) 16S ribosomal RNA

TCTCATGGAGAGTTTCGATCCTGGCTCAGGATGAACGCTGGCGGCATGCTTAACACATGCAAGTCGGACGGGAAGTGGTGTTCAGTGGCGGAC  
GGGTGAGTAACCGGTAAAGAACCTGCCCTTGGGAGGGGAACAACAGCTGGAACCGGCTGCTAATACCCCGTAGGCTGAGGAGCAAAAGGAGGAAT  
CCGCCCCGAGGAGGGGCTCGCGTCTGATTAGCTAGTTGGTGAGGCAATAGCTTACCAAGCGCATGATCAGTAGCTGGTCCGAGAGGATGATCAGC  
CACACTGGGACTGAGACACGGCCAGACTCCTACGGGAGGCAGCAGTGGGGAATTTTCCGCAATGGGCGAAAGCCTGACGGAGCAATGCCGCGT  
GGAGGTAAAGGCTACGGGCTCGTAACCTCTTTTCCAGAGAAGAAGCAATGACGGTATCTGGGGAATAAGCATCGGCTAACTCTGTGCCAGC  
AGCCCGGTAAACAGAGGATGCAAGCGTTATCCGGAATGATTGGGCGTAAAGCGTCTGTAGGTGGCTTTTAAAGTCCGCGGTCAAATCCCGAGG  
GCTCAACCCTGGACAGGCGGTGGAAACTACCAAGCTTGAGTACGGTAGGGGCAGAGGGAATTTCCGGTGGAGCGGTGAAATGCGTAGAGATCGG  
AAAGAACAACCAACGGCGCAAGCACTCTGCTGGGCCGACACTGACACTGAGAGACGAAAGCTAGGGGAGCGAATGGGATTAGATACCCACAGTAGT  
CCTAGCCGTAAACGATGGATACTAGGCGCTGTGCGTATCGACCCGTGCAGTGTGTAGCTAACGCGTTAAGTATCCCGCTGGGAGTACGTTT  
GCAAGAATGAAACTCAAAGGAATTGACGGGGGCCCCGACAAAGCGGTGGAGCATGTGGTTAATTTCGATGCAAAGCGAAGAACCTTACCAGGGCT  
TGACATGCCGCGAATCCTCTTGAAGAGAGGGGTGCCTTCGGGAACGCGGACACAGGTGGTGCATGGCTGTCGTAGCTCGTGCCGTAAGGTGT  
TGGGTTAAGTCCCGCAAGCAGGCGCAACCCCTCGTGTTTAGTTGCCACCGTTGAGTTTGGAAACCCGTAACAGACTGCCGGTGATAAGCCCGAGGAA  
GGTGAGGATGACGTCAAGTCATCATGCCCTTATGCCCTGGGCGACACACGTGCTACAATGGCCGGGACAAAGGGTCGCGATCCCGCGAGGGTG  
AGCTAACTCCAAAACCCGTCCTCAGTTTCGGATTGCGAGGTGCAACTCGCCTGCATGAAGCCGGAATCGCTAGTAATCGCCGGTCAGCCATACG  
GCGGTGAATTCGTTCCCGGGCCTTGTACACACCCGCCGTCACACTATGGGAGCTGGCCATGCCCGAAGTCGTTACCTTAACCGCAAGGAGGGGG  
GTGCCGAAGGCAGGGCTAGTGACTGGAGTGAAGTCGTAACAAGGTAGCCGTACTGGAAGGTGCGGCTGGATCACCTCCTTT

>ENA|AM087200.3:101968..103467:rRNA|AM087200.3:101968..103467:rRNA.3 *Solanum lycopersicum*  
(tomato) 16S ribosomal RNA

TCTCATGGAGAGTTTCGATCCTGGCTCAGGATGAACGCTGGCGGCATGCTTAACACATGCAAGTCGGACGGGAACACGGGAACCGGTGTTTCCA  
GTGGCGGACGGGTGAGTAACGCGTAAGAACCTGCCCTTGGGAGGGGAACAACAGCTGGAACCGGCTGCTAATACCCCGTAGGCTGAGGAGCAAA  
AGGAGGAATCCGCGGAGGAGGGGCTCGCGTCTGATTAGCTAGTTGGTGAGGCAATAGCTTACCAAGGCGATGATCAGTAGCTGTGTCGAGGAGG  
ATGATCAGCCACACTGGGACTGAGACACGGCCAGACTCCTACGGGAGGCAGCAGTGGGGAATTTTCCGCAATGGGCGAAAGCCTGACGGAGCA  
ATGCCGCGTGAGGTAGAAGGCCACGGGTCGTGAACCTCTTTTCCCGGAGAAGAAGCAATGACGGTATCTGGGGAATAAGCATCGGCTAACTC  
TGTGCCAGCAGCCGCGGTAATACAGAGGATGCAAGCGTTATCCGGAATGATTGGGCGTAAAGCGTCTGTAGGTGGCTTTTAAAGTCCGCCGTCA  
AATCCCGAGGCTCAACCCCTGGACAGGCGGTGGAAACTACCAAGCTGGAGTACGGTACGGGACAGAGGGAATTTCCGGTGGAGCGGTGAAATGCGT  
AGAGATCGGAAGAACACCAACGGCGAAAGCACTCTGCTGGGCCGACACTGACACTGAGAGACGAAAGCTAGGGGAGCGAATGGGATTAGATAC  
CCCAGTAGTCTTAGCCGTAAACGATGGATACTAGGCGCTGTGCGTATCGACCCGTGCAGTGTGTAGCTAACGCGTTAAGTATCCCGCTGGGG  
AGTACGTTTCGCAAGAATGAAACTCAAAGGAATTGACGGGGGCCCCGACAAAGCGGTGGAGCATGTGGTTAATTTCGATGCAAGCGAAGAACCTT  
ACCAGGGCTTGACATGCCGCGAATCCTCTTGAAGAGAGGGGCTGCCCTTCGGGAACGCGGACACAGGTGGTGCATGGCTGTCGTAGCTCGTGCC  
GTAAGGTGTTGGGTAAAGTCCCGCAACGAGCGCAACCCCTCGTGTTTAGTTGCCATCGTTGAGTTTGGAAACCCGTAACAGACTGCCGGTGATAAG  
CCGGAGGAAGGTGAGGATGACGTCAAGTCATCATGCCCTTATGCCCTGGGCGACACAGTGTACAATGGCCGGGACAAAGGGTCGCGATCCC  
CGGAGGGTGAGCTAACCCCAAAAACCCGTCCTCAGTTTCGGATTGACGGGTGCAACTCGCCTGCATGAAGCCGGAATCGCTAGTAATCGCCGGTC  
AGCCATACGGCGGTGAATTCGTTCCCGGGCCTTGTACACACCCGCCGTCACACTATGGGAGCTGGCCATGCCCGAAGTCGTTACCTTAACCGCAAGGAGGGGG  
AGGAGGGGGATGCCGAAGGCAGGGCTAGTGACTGGAGTGAAGTCGTAACAAGGTAGCCGTACTGGAAGGTGCGGCTGGATCACCTCCTTT

>GU592207.1:122359..123849:rRNA, *Oryza sativa Japonica* Group (Japanese rice) 16S ribosomal RNA  
tctcatggagagttcgatccttgctcaggatgaacgctggcgcatgcttaacacatgcaagtcgaacggaagtgggtgttccagtggcgaac  
gggtgagtaacgctgaagaacctgcccttgggaggggaacaacaactggaacggttgctataaccccgtaggctgaggagcaaaaggagaaat  
ccgcccaggaggggctcgctctgattagctagttggtgaggaatagcttaccagcgatgatcagtagctggtccgagaggatgatcagc  
cacactgggactgagacagggccagactcctacgggagggcagctggggaattttccgcaatgggcgaaagcctgacggagcaatgccgctg  
ggaggtggaagccacagggctcgtaacctctttctcggagagaacaacatgacggtatctgaggaataagcatcgctaaactctgtgccagc  
agccgcggtgaagacagaggatgcaagcgttatccggaatgattggcgctaaagcgtctgtaggtggcttttcaagtccgctgcaatccagag

gctcaaccctggacaggcgggtgaaactaccaagctggagtacggttaggggcagaggggaatttcgggtggagcggtgaaatgcattgagatcgg  
aaagaacaccaacggcgaaagcactctgctgggcccgaactgacactgagagacgaaagctaggggagcaaattgggattagagaccccagtagt  
cctagccgtaaacgatggatactaggtgctgtgcgactcgaccctgcaagtgtgctgtagctaaccgcttaagtatcccgcctggggagtagcttc  
gcaagaatgaaactcaaaggaattgacggggggccgcacaaagcgggtggagcatgtgggtttaattcgcgtgcaaagcgaagaaccttaccagggct  
tgacatgccgcgaatcctcttgaagagaggggtgcccctcggaacgcgggacacaggtggtgcatggctgtcgtcagctcgtgcccgtaaaggtgt  
tgggttaagtctcgcaacgagcgcaaccctcgtgtttagttggcactatgagtttgaaccctgaacagaccgcccgggtgttaagccggaggaag  
gagaggtgagggccaagtcatactgccccttatgcccctggggcagacacagtgctacaatggggcgggacaaaggggtcgcgatctcgcgaggggtga  
gctaactccaaaaacccgtcctcagttcggattgcaggctgcaactcgccctgcatgaagcaggaatcgctagtaaatcgccgggtcagccatacgg  
cgggtgaatccgttcccgggccttgtacacaccgcccgtcacactatagagagctggccatgtttgaagtcattacccttaaccgtaaggaggggg  
atgcctaaggctaggtctgcgactggagtgaagtcgtaacaaggtagccgtactggaaggtgcggtggatcacctccttt

>ENA|AP005672.1:120253..121750:rRNA|AP005672.1:120253..121750:rRNA.1 Physcomitrella patens 16S  
rRNA

TCTCATGGAGAGTTTGATCCTGGCTCAGGATGAACGCTGGCGGCATGCTTAACACATGCAAGTCGGACGGAAAGCACCTTTTGGTGTTTTCAGT  
GGCGGACGGGTGAGTAACGCGTAAGAACTGCCCTTGGGAGGGGGACAACAGCTGGAAACGGTTGCTAATACCCCATAAAGCTGAGGAGTAAAG  
GAGGAATCCGCCATAAGGAGGGGCTTGCGTCTGATTAGCTAGTTGGTGAGGCAATGGCTTACCAAGGCGACGATCAGTAGCTGGTCTGAGAGGAT  
GATCAGCCACACTGGGACTGAGACACGCCCCAGACTCCTACGGGAGGCAGCAGTGGGGAATTTCCGCAATGGGCGAAAGCCTGACGGAGCAAT  
GCCCGGTGGAGGTAGAAGGCCACGGGTCGTAAACTCCTTTTCTCAGAGAAGAAGCAATGACGGTATCTGAGGAATAAGCATCGGCTAACTCTG  
TGCCAGCAGCCGCGTAAAGACAGAGGATGCAAGCGTTATCCGGAATGATTGGGCGTAAAGCGTCTGTAGGTGGCTTTTAAAGTCTGCTGTCAAA  
TCCCAGGGCTCAACCTTGGACAGGCGGTGGAACTACCAAGCTGGAGTACGGTAGGGGCAGAGGAATTTCCGGTGGAGCGGTGAAATGCGTAG  
AGATCGGAAAGAACACCACGGCGAAAGCACTCTGCTGGGCCGACACTGACACTGAGAGACGAAAGCTAGGGGAGCGAATGGGATTAGATACCC  
CAGTAGTCTAGCCGTAAACGATGGATACTAAGCGCTGCGCGTATCGACCCGTGCAGTGTGTAGCTAACGCGTTAAGTATCCCGCTGGGGAG  
TAGCTTTCGAAGATGAAGACTCAAAGGAATTGACGGGGGCCGACAACGCGGTGGAGCATGTGGTTTAATTTCGATGCAAGCGAAGAACCTTAC  
CAGGGCTTGACATGCCGCGAATCCTTTTGAAAGAAAGGAGTGCCTTCGGGAACCGGCACACAGGTGGTGCATGGCTGTCTGCTCAGTCTGTGCCGT  
AAGGTGTGGGTAAAGTCCCGCAACGAGCGCAACCCCTCGTGTTTAGTTGCCATCATTTAGTTTGGAAACCCTAAACAGACTGCCCGTGATAAGCC  
GGAGGAAGGTGAGGATGACGTCAAGTCAGCATGCCCTTACGCCCTGGGCGACACACGTGCTACAATGGCCGGGACAAAGGGTCGCGACCCCGC  
GAGGGCAAGCTAACCTCAAAAACCCGGCTCAGTTCGGATTGCAAGGTGCAACTCGCCTGCATGAAGCCGGAATCGCTAGTAATCGCCGGTCAAG  
CCATACGGCGGTGAATCCGTTCGCCGGCTTGTACACACCGCCCGTCACACTATGGGAGCTGGCCATGCCCAAGTCGTTACCCTAACCGCAAG  
GAGGAGGATGCCGAAGGCAGGGCTAGTGACTGGAGTGAAGTCGTAACAAGGTAGCCGTACTGGAAGGTGCGGCTGGATCACCTCCTTT

>ENA|CP000230.1:192528..194004:rRNA|CP000230.1:192528..194004:rRNA.1 Rhodospirillum rubrum  
ATCC 11170 16S ribosomal RNA

AGAGTTTGATCCTGGCTCAGGACGAACGCTGGCGGCAGGCCTAACACATGCAAGTCGAACGCATCCTTCGGGATGAGTGGCGCACGGGTGAGTA  
ACACGTGGGAACGTACCTTGGAGTGCAGGAATAATCTTTGGAACGAGGACTAATACCGCATACGCCCTTAGGGGGAAAGATTTATCGCTCCAAG  
ATCGGCCCCGCGTCCGATTAGCTAGTTGGCGGGTAATGGCCCCACCAAGGCGACGATCGGTAGCTGGTCTGAGAGGATGGCCAGCCACACTGGGA  
CTGAGACACGCCCCAGACTCCTACGGGAGGCAGCAGTGGGGAATATTGCGCAATGGGGGCAACCCCTGACGCAGCCATGCCGCGTGAGTGAAGAA  
GGCCTTCGGGTTGTAAAGCTCTTTCGGGTGTGAAGATGATGACGGTAACACCAGAAGAAGCCCCGGCTAACTTCGTGCCAGCAGCCGCGTAAT  
ACGAAGGGGGCAAGCGTTGTTCCGAATTACTGGGCGTAAAGAGCGCGTAGGCGGTCTGATTAGTCAGAGGTGAAATCCCAGAGCTCAACTTTGG  
AACTGCCTTTGATACTGTAGACTAGAATCCGTGAGAGGTGGTGGAATTCACAGTGTAGAGGTGAAATTCGTAGATATTGGGAGGAACACCAG  
TGGCGAAGGCGGCCACCTGGCGCGGTATTGACGCTGAGGCGCGAAAGCGTGGGGAGCAAAACAGGATTAGATACCTGGTAGTCCACGCCGTAAA  
CGATGAGTGCTAGATGTGGGGTACATGTACCTCGGTGTCGACGCTAACGCATTAAGCACTCCGCCTGGGGAGTACGGCCGCAAGGTTAAACT  
CAAAGGAATTGACGGGGGCCCGCACAAAGCGGTGGAGCATGTGGTTAATTTCGAAGCAACGCGCAGAACCTTACCAGCCCTTGACATCCCGTGAC  
ACTTCCAGAGATGGAAGGTTCCCTTCGGGGACACGGTGACAGGTGCTGCATGGTGTCTGTCAGCTCGTGTCTGAGATGTTGGGTTAAGTCCCG  
CAACGAGCGCAACCCCTCATCTTCAGTTGCCAGCAAGTAACGTTGGGCACCTCTGAAGAGACTGCCGGTGACAAGCCGGAGGAAGGTGGGGATGAC  
GTCAAGTCTCATGGCCCTTACGGGCTGGGCTACACACGTGCTACAATGGCGCTACAATGGGCAGCGACCTCGCGAGGGGAAGCTAATCTCCA  
AAAGGCGTCTCAGTTCGATTGCACTCTGCAACTCGGGTGCATGAAGTCGGAATCGCTAGTAATCGTGGATCAGCATGCCACGGTGAATACGTT  
CCCGGGCTTGTACACACCGCCCGTCACACCATGGGAGTTGGTTCTACCCGAAGACGGTACGCTAACCGCAAGGAGGCAGCCGGCCACGGTAGG  
GTCAGCGACTGGGGTGAAGTCGTAACAAGGTAGCCGTAGGGGAACCTGCGGCTGGATCACCTCCTTT
